# Supplementary material for: Hepatic Steatosis and Fibrosis in Chronic Inflammatory Bowel Disease
Source: MDPI journal article supplement (doi:10.3390/jcm11092623), 2022-05-06
Supplement: s1 [file s1]

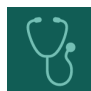

Table S1. Steatosis.

| Variables in the Equation |                       | B      | S.E.  | Wald  | df | Sig.  | Exp(B) | 95% C.I. for EXP(B) |        |
|---------------------------|-----------------------|--------|-------|-------|----|-------|--------|---------------------|--------|
|                           |                       |        |       |       |    |       |        | Lower               | Upper  |
| Step 1 <sup>a</sup>       | Age                   | 0.018  | 0.020 | 0.802 | 1  | 0.371 | 1.018  | 0.979               | 1.059  |
|                           | BMI                   | 0.001  | 0.005 | 0.096 | 1  | 0.756 | 1.001  | 0.992               | 1.011  |
|                           | Duration of disease   | 0.072  | 0.027 | 7.247 | 1  | 0.007 | 1.075  | 1.020               | 1.133  |
|                           | Steroids              | 1.211  | 0.764 | 2.513 | 1  | 0.113 | 3.358  | 0.751               | 15.019 |
|                           | AST                   | −0.001 | 0.006 | 0.037 | 1  | 0.848 | 0.999  | 0.987               | 1.011  |
|                           | g-glutamyltransferase | 0.002  | 0.003 | 0.537 | 1  | 0.464 | 1.002  | 0.997               | 1.007  |
|                           | CRP                   | −0.008 | 0.006 | 1.452 | 1  | 0.228 | 0.992  | 0.980               | 1.005  |
|                           | Nicotine use          | −0.484 | 0.605 | 0.640 | 1  | 0.424 | 0.616  | 0.188               | 2.017  |
|                           | Constant              | −2.578 | 1.080 | 5.697 | 1  | 0.017 | 0.076  |                     |        |

a. Variable(s) entered on step 1: Age, BMI, Duration of disease, Steroids, AST, gamma-glutamyltransferase, CRP, nicotine use. Multivariate logistic regression method enter; *p* value significance < 0.05; B: Co-efficient for the constant; SE: standard error around the co-efficient for the constant; Wald chi square statistics; df: degree of freedom for Wald chi square statistics; Exp(B): exponentiation of B co-efficient which is an odds ratio (OR); CI: 95% Confidence interval for the odds ratio with its upper and lower limits.

Table S2. Fibrosis.

| Variables in the Equation |                       | B      | S.E.  | Wald   | Df | Sig.  | Exp(B) | 95% C.I. for EXP(B) |        |
|---------------------------|-----------------------|--------|-------|--------|----|-------|--------|---------------------|--------|
|                           |                       |        |       |        |    |       |        | Lower               | Upper  |
| Step 1 <sup>a</sup>       | Duration of disease   | 0.092  | 0.036 | 6.484  | 1  | 0.011 | 1.096  | 1.021               | 1.176  |
|                           | AST                   | 0.001  | 0.018 | 0.003  | 1  | 0.956 | 1.001  | 0.965               | 1.038  |
|                           | g-glutamyltransferase | 0.001  | 0.004 | 0.067  | 1  | 0.796 | 1.001  | 0.993               | 1.009  |
|                           | IBD Type              | 1.385  | 1.117 | 1.538  | 1  | 0.215 | 3.996  | 0.448               | 35.686 |
|                           | Hepatomegaly          | −0.478 | 0.784 | 0.372  | 1  | 0.542 | 0.620  | 0.133               | 2.880  |
|                           | ALT                   | 0.001  | 0.022 | 0.004  | 1  | 0.947 | 1.001  | 0.959               | 1.046  |
|                           | Constant              | −4.998 | 1.379 | 13.135 | 1  | 0.000 | 0.007  |                     |        |

a. Variable(s) entered on step 1: Duration of disease, AST, gamma-glutamyltransferase, IBD Type (Crohn's disease, ulcerative colitis) Hepatomegaly, ALT. Multivariate logistic regression method enter; *p* value significance < 0.05; B: Co-efficient for the constant; SE: standard error around the co-efficient for the constant; Wald chi square statistics; df: degree of freedom for Wald chi square statistics; Exp(B): exponentiation of B co-efficient which is an odds ratio (OR); CI: 95% Confidence interval for the odds ratio with its upper and lower limits.
